# Supplementary material for: Interferon- and STING-independent induction of type I interferon stimulated genes during fractionated irradiation
Source: J Exp Clin Cancer Res. 2021 May 8;40:161. doi: 10.1186/s13046-021-01962-2 (PMC8106844; doi:10.1186/s13046-021-01962-2)
Supplement: Supplementary file 2 — Additional file 2. [file 13046_2021_1962_MOESM2_ESM.zip]

Archive with 9 entries (9 files):
- Additional file 2 Supplementary figure S1 to S8 legends.docx
- Figure S1.pdf
- Figure S2.pdf
- Figure S3.pdf
- Figure S4.pdf
- Figure S5.pdf
- Figure S6.pdf
- Figure S7.pdf
- Figure S8.pdf
